# Supplementary material
Source: ML conference proceedings conference paper supplement (https://www.ecva.net/papers/eccv_2022/papers_ECCV/html/136920400_ECCV_2022_paper.php)
Supplement: Supplementary file 2 [file 136920400-supp.zip]

# Supplementary Material – NeuMan: Neural Human Radiance Field from a Single Video

Wei Jiang<sup>†1,2</sup>, Kwang Moo Yi<sup>1,2</sup>, Golnoosh Samei<sup>1</sup>,  
Oncel Tuzel<sup>1</sup>, and Anurag Ranjan<sup>1</sup>

<sup>1</sup> Apple

<sup>2</sup> The University of British Columbia

{jw221, kmyi}@cs.ubc.ca, {golnoosh, otuzel, anuragr}@apple.com

## A.1 Dataset Details

The dataset details are as follows.

| Sequence | Total Frames | Train Frames | Validation Frames | Test Frames |
|----------|--------------|--------------|-------------------|-------------|
| Seattle  | 41           | 33           | 4                 | 4           |
| Citron   | 37           | 30           | 4                 | 3           |
| Parking  | 42           | 34           | 4                 | 4           |
| Bike     | 104          | 83           | 11                | 10          |
| Jogging  | 102          | 82           | 10                | 10          |
| Lab      | 103          | 82           | 11                | 10          |

Table 1: Number of frames in each dataset used for training, validation and test.

## A.2 SMPL Refinement

Given an image, we regress the 2D joints  $j_{2d}$  and segmentation mask  $m$  of the human using HigherHRNet [1] and DensePose [2]. We further estimate the SMPL mesh  $M = (V, F)$ , a collection of vertices and faces using ROMP [7]. The mesh  $M$  is parametrized by SMPL parameters  $\theta$  such that  $M = \text{SMPL}(\theta)$  and includes the 3D joints  $j_{3d}$ . The regressed SMPL parameters  $\theta$  are noisy. Therefore, we use soft-rasterizer [4],  $\Pi$  to refine these estimates. Given a mesh,  $M$  and camera  $\theta_c$ , the rasterizer renders a silhouette  $\hat{m} = \Pi(\theta_c, M)$ . We also project the 3D joints in the image plane using camera matrix  $\hat{j}_{2d} = \mathbf{p}(j_{3d})$  where  $\mathbf{p}$  is a projection operator. We obtain the refined SMPL parameters and camera estimates by minimizing

$$\theta^* = \min_{\theta} \| m - \hat{m} \| + \| j_{2d} - \hat{j}_{2d} \| . \quad (1)$$

---

<sup>†</sup>Work done while interning at Apple.



#### A.4 Comparison with previous works

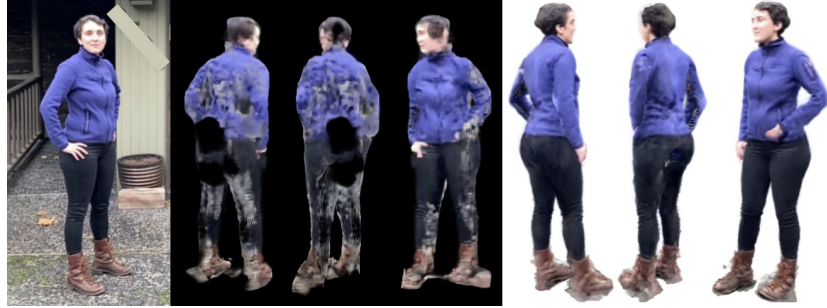

Fig. 2: **Novel view rendering of NeuralBody vs Ours on Seattle sequence.** – The pose being rendered is from the left training image. Three images in the middle are the novel view renderings from NeuralBody, and three images on the right are from ours.

We apply NeuralBody [6] to our dataset in a monocular setting. The results are shown in 2. NeuralBody [6] overfits to the training observations, and produce poor rendering on the back of the subject, while ours generalize better and can faithfully render the back.

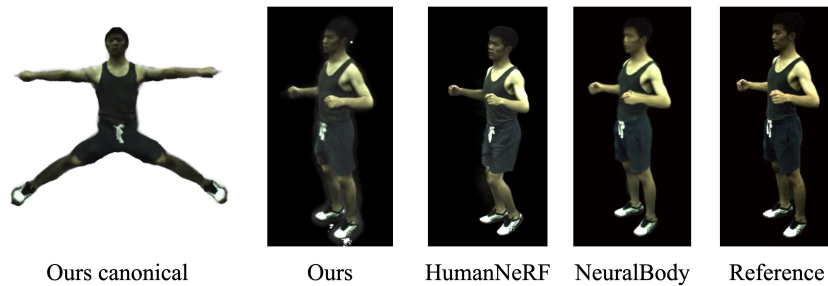

Fig. 3: **Novel View Reconstructions on public ZJU Mocap dataset [6]** – Ours and HumanNeRF [8] use only one camera view, NeuralBody [6] uses multiple camera views.

we also compare our method with HumanNeRF [8] and NeuralBody [6] on a ZJU Mocap dataset, as shown qualitative comparisons in Figure 3. Our method renders high quality novel view renderings with the ability to extrapolate in pose space.

## A.5 Error Correction Network and Scene Model Conditioning

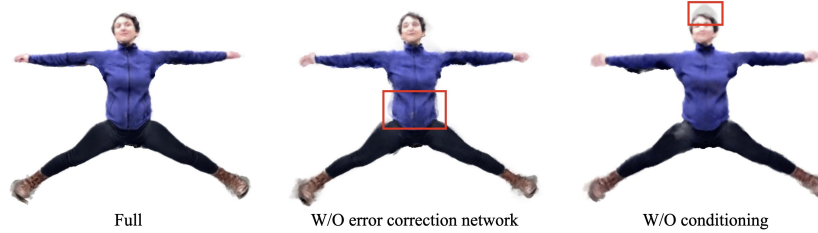

Fig. 4: Canonical renderings of our full model, model without error correction network, and model without conditioning on scene NeRF.

Without the error correction network, the canonical NeRF lacks details on the cloth and face. Training only the human NeRF in isolation leads to worse performance as the human NeRF model may encode the background pixels into its radiance fields due to segmentation errors. In either case, the canonical NeRF creates fogs around the human to hallucinate the clothing dynamics or the background colors, as shown in 4.

## References

- Cheng, B., Xiao, B., Wang, J., Shi, H., Huang, T.S., Zhang, L.: HigherHRNet: Scale-Aware Representation Learning for Bottom-Up Human Pose Estimation. In: CVPR (2020) 1
- Güler, R.A., Neverova, N., Kokkinos, I.: Densepose: Dense human pose estimation in the wild. In: Proceedings of the IEEE conference on computer vision and pattern recognition. pp. 7297–7306 (2018) 1, 2
- He, K., Gkioxari, G., Dollár, P., Girshick, R.: Mask R-CNN. In: Proceedings of the IEEE international conference on computer vision. pp. 2961–2969 (2017) 2
- Liu, S., Li, T., Chen, W., Li, H.: Soft rasterizer: A differentiable renderer for image-based 3d reasoning. In: Proceedings of the IEEE/CVF International Conference on Computer Vision. pp. 7708–7717 (2019) 1
- Mildenhall, B., Srinivasan, P.P., Tancik, M., Barron, J.T., Ramamoorthi, R., Ng, R.: Nerf: Representing scenes as neural radiance fields for view synthesis. In: European conference on computer vision. pp. 405–421. Springer (2020) 2
- Peng, S., Zhang, Y., Xu, Y., Wang, Q., Shuai, Q., Bao, H., Zhou, X.: Neural body: Implicit neural representations with structured latent codes for novel view synthesis of dynamic humans. In: Proceedings of the IEEE/CVF Conference on Computer Vision and Pattern Recognition. pp. 9054–9063 (2021) 3
- Sun, Y., Bao, Q., Liu, W., Fu, Y., Michael J., B., Mei, T.: Monocular, One-stage, Regression of Multiple 3D People. In: ICCV (October 2021) 1
- Weng, C.Y., Curless, B., Srinivasan, P.P., Barron, J.T., Kemelmacher-Shlizerman, I.: HumanNeRF: Free-viewpoint Rendering of Moving People from Monocular Video. arXiv preprint arXiv:2201.04127 (2022) 3
